1 Manuscript title:

2 **Covering soybean leaves with cellulose nanofiber changes leaf surface**  
3 **hydrophobicity and confers resistance against *Phakopsora pachyrhizi***

4

5 Authors' full names:

6 Haruka Saito<sup>1</sup>, Yuji Yamashita<sup>1</sup>, Nanami Sakata<sup>1</sup>, Takako Ishiga<sup>1</sup>, Nanami Shiraishi<sup>1</sup>,  
7 Viet Tru Nguyen<sup>2</sup>, Eiji Yamamura<sup>1</sup> and Yasuhiro Ishiga<sup>1\*</sup>

8

9 Institution addresses:

10 <sup>1</sup>Faculty of Life and Environmental Sciences, University of Tsukuba, 1-1-1 Tennodai,  
11 Tsukuba, Ibaraki 305-8572, Japan.

12 <sup>2</sup>Western Highlands Agriculture and Forestry Science Institute, Nguyen Luong Bang,  
13 Buon Ma Thuot, Dak Lak, Vietnam.

14

15 \*For correspondence:

16 Yasuhiro Ishiga

17 Address: Faculty of Life and Environmental Sciences, University of Tsukuba, 1-1-1  
18 Tennodai, Tsukuba, Ibaraki 305-8572, Japan.

19 Email: [ishiga.yasuhiro.km@u.tsukuba.ac.jp](mailto:ishiga.yasuhiro.km@u.tsukuba.ac.jp)

20 Tel/Fax (+81) 029-853-4792

21

22 **Abstract**

23 Asian soybean rust (ASR) caused by *Phakopsora pachyrhizi*, an obligate biotrophic  
24 fungal pathogen, is the most devastating soybean production disease worldwide.  
25 Currently, timely fungicide application is the only means to control ASR in the field. We  
26 investigated cellulose nanofiber (CNF) application on ASR disease management.  
27 CNF-treated leaves showed reduced lesion number after *P. pachyrhizi* inoculation  
28 compared to control leaves, indicating that covering soybean leaves with CNF confers *P.*  
29 *pachyrhizi* resistance. We also demonstrated that formation of *P. pachyrhizi*  
30 pre-infection structures including germ-tubes and appressoria, and also gene expression  
31 related to these formations, such as *chitin synthases* (*CHSs*), were significantly  
32 suppressed in CNF-treated soybean leaves compared to control leaves. Moreover,  
33 contact angle measurement revealed that CNF converts soybean leaf surface properties  
34 from hydrophobic to hydrophilic. These results suggest that CNF can change soybean  
35 leaf surface hydrophobicity, conferring resistance against *P. pachyrhizi*, based on the  
36 reduced expression of *CHSs*, as well as reduced formation of pre-infection structures.  
37 This is the first study to investigate CNF application to control field disease.

38

39

40 **Keywords**

41 Asian soybean rust; Cellulose nanofiber; *Chitin synthase*; Hydrophobicity; *Phakopsora*  
42 *pachyrhizi*; Pre-infection structure

43

44

45

## 46 **Introduction**

47 Diseases in important crop plants have a significant negative impact on  
48 agricultural productivity. For example, Asian soybean rust (ASR) caused by *Phakopsora*  
49 *pachyrhizi*, an obligate biotrophic fungal pathogen, is the most devastating soybean  
50 production disease worldwide, with an estimated crop yield loss of up to 90%. ASR has  
51 impacted the South American economy in recent years. Yorinori et al. (1) reported that  
52 the losses caused by ASR were ~2 billion US dollars in Brazil alone in 2003. Although  
53 most rust fungi have a high host specificity, the *P. pachyrhizi* host range is broad and  
54 can infect diverse leguminous plant leaves in the field (2). The infection process starts  
55 when urediniospores germinate to produce a single germ-tube with an appressorium.  
56 Unlike cereal rust fungi that penetrates through stomata (3), *P. pachyrhizi* directly  
57 penetrates into host plant epidermal cells by an appressorial peg. After penetration, *P.*  
58 *pachyrhizi* extends the infection hyphae and forms haustoria (feeding structures) in the  
59 mesophyll cells 24 to 48 hours after infection (4). At five to eight days after infection, *P.*  
60 *pachyrhizi* then produces urediniospores by asexual reproduction (4). Urediniospores  
61 can be dispersed by wind and germinate on other host plants.

62 There are several ASR control methods for soybean protection against *P.*  
63 *pachyrhizi*, including chemical control by fungicide application, growing ASR resistant  
64 soybean cultivars, and employing cultivation practices. Synthetic fungicides are the  
65 primary ASR disease control method. However, fungicide use can cause many problems  
66 such as environmental impacts (5), increased production costs (6), and the emergence of  
67 fungicide-resistant pathogens (7, 8). Another major and effective control method is  
68 breeding or engineering of ASR resistant soybean cultivars. Analysis of soybean  
69 accessions disclosed six dominant *R* genes conferring resistance to a particular *P.*  
70 *pachyrhizi* race, and these loci were referred to as the *Rpp* 1–6 genes (9–13). However,

71 none of the soybean accessions in the world show resistance to all *P. pachyrhizi* races  
72 (14). Due to the limited resistance available in soybean cultivars, heterologous  
73 expression of resistance genes from other plant species in soybean has been investigated  
74 as an alternative source of ASR resistance. Kawashima et al. (15) reported that soybean  
75 plants expressing *CcRpp1* (*Cajanus cajan* Resistance against *Phakopsora pachyrhizi* 1)  
76 from pigeon pea (*Cajanus cajan*) showed full resistance against *P. pachyrhizi*.  
77 Conversely, identifying resistance traits from non-host plant species has become an  
78 intelligent approach. Uppalapati et al. (16) screened *Medicago truncatula* *Tnt1* mutant  
79 lines and identified an *inhibitor of rust germ tube differentiation 1* (*irg1*) mutant with  
80 reduced formation of pre-infection structures, including germ-tubes and appressoria.  
81 They demonstrated that the loss of abaxial epicuticular wax accumulation resulting in  
82 reduced surface hydrophobicity inhibited formation of pre-infection structures on the  
83 *irg1* mutant (16). Furthermore, Ishiga et al. (17) reported that gene expression related to  
84 pre-infection structure formation were activated on the hydrophobic surface of the *M.*  
85 *truncatula* wild-type, but not on the *irg1* mutant, based on *P. pachyrhizi* transcriptome  
86 analysis, suggesting that leaf surface hydrophobicity can trigger gene expression related  
87 to formation of pre-infection structures. Based on these previous studies, we  
88 hypothesized that modification of leaf surface hydrophobicity might be a useful strategy  
89 to conferring resistance against *P. pachyrhizi*.

90 Cellulose is an organic polysaccharide consisting of a  $\beta$ -1,4 linked  
91 glucopyranose skeleton. Cellulose is an important structural component of plant primary  
92 cell walls and is essential in maintaining the plant structural phase. Due to the positive  
93 properties, cellulose has been investigated as an application in different research and  
94 development fields including energy, environmental, water, and biomedical related  
95 fields (18). Cellulose nanofiber (CNF), which can be derived from cellulose, is one of

196 the most abundant and renewable biomasses in nature (19). Because CNF exhibits  
197 properties such as low weight, high aspect ratio, high strength, high stiffness, and large  
198 surface area, CNF potentially has wide areas of application. There are several CNF  
199 isolation methods, e.g. acid hydrolysis, enzymatic hydrolysis, and mechanical processes.  
200 The aqueous counter collision (ACC) method can make it possible to cleave interfacial  
201 interactions among cellulose molecules without any chemical modification (20). Both  
202 hydrophobic and hydrophilic sites co-exist in a cellulose molecule resulting in  
203 amphiphilic properties when CNF is derived from the ACC method. Kose et al. (21)  
204 reported that coating with CNF derived from the ACC method could switch surface  
205 hydrophilic and hydrophobic properties, depending on substrate characteristics. They  
206 demonstrated that coating a filter paper and polyethylene with CNF changed the surface  
207 property into hydrophobic and hydrophilic, respectively (21). To investigate the  
208 potential application of CNF in agriculture, we examined whether coating with CNF  
209 protected soybean plants against *P. pachyrhizi*. We show that a specific CNF property  
210 can change soybean leaf surface hydrophobicity, resulting in reduced formation of  
211 pre-infection structures associated with reduced *P. pachyrhizi* infection.

212

## 213 **Materials & Methods**

### 214 **Plant growth conditions, CNF treatment and pathogen inoculation assay**

215 Susceptible soybean cultivar seeds (*Glycine max* cv. Enrei) were germinated in  
216 a growth chamber at 25°C/20°C with 16-hrs-light/8-hrs-dark cycle (100-150  $\mu$  mol m<sup>-2</sup>  
217 s<sup>-1</sup>) for 3 to 4 weeks.

218 Cellulose nanofiber (CNF, marketed as nanoforest®) supplied through the  
219 courtesy of the Chuetsu Pulp & Paper (Takaoka, Japan) was used. A bamboo-derived  
220 CNF (BC) and a needle-leaved tree-derived CNF (NC) were adjusted to a concentration

121 of 0.1% including 0.02% Tween 20 (FUJIFILM, Tokyo, Japan) before treatment. Both  
122 adaxial and abaxial sides of soybean leaves were spray-treated with 0.1% CNF till  
123 runoff and then the treated soybean plants were dried at room temperature for 3 to 4  
124 hours before inoculation.

125 An isolate of the ASR pathogen *P. pachyrhizi* T1-2 (22) was maintained on  
126 soybean leaves. Fresh urediniospores were collected and suspended in distilled water  
127 with 0.001% Tween 20. The 3-week-old soybean plants were spray-inoculated with  $1 \times$   
128  $10^5$  spores/ml using a hand sprayer for uniform spore deposition. The inoculated plants  
129 were maintained in a chamber for 24 hours with 90% to 95% humidity at 23°C;  
130 0-hrs-light/24-hrs-dark cycle. The plants were then transferred to a growth chamber  
131 (22°C/20 °C with 16 hrs-light/8 hrs-dark cycle) and incubated further to allow symptom  
132 development.

133 To quantify lesion number on ASR on CNF-treated plants, soybean leaves were  
134 spray-inoculated with *P. pachyrhizi*. At 10 days after inoculation, photographs were  
135 taken, and lesions were counted to calculate the lesion number per  $\text{cm}^2$ . Lesions were  
136 counted from 54 random fields on three independent leaves.

137 To quantify the formation of pre-infection structures including germ-tubes and  
138 appressoria on control and CNF-treated plants, soybean leaves were spray-inoculated  
139 with *P. pachyrhizi*  $1 \times 10^5$  spores/ml. At 72 hours after inoculation, the leaves were  
140 observed and photographed with the desktop scanning electron microscope (HITACHI  
141 TM3000, Tokyo, Japan). The germ-tubes forming differentiated appressoria were  
142 counted as appressoria. The differentiated germ-tubes without appressoria that grew on  
143 the leaf surface were also counted from 54 random fields on three independent leaves.

144

145 **Real-time quantitative RT-PCR analyses**

146 To investigate the gene expression profiles related to pre-infection structures,  
147 approximately 100 *P. pachyrhizi* spores in 10  $\mu$ l aliquots were placed on the abaxial  
148 surface of 4-week-old detached soybean leaves with or without 0.1% CNF and  
149 incubated in darkness overnight, and then transferred to a growth chamber (22°C/20°C  
150 with 16-h-light/8-h-dark cycle). At 24 and 48 hours after inoculation, total RNA was  
151 extracted from the inoculated leaf areas and purified using RNAiso Plus (TaKaRa, Otsu,  
152 Japan) according to the manufacture's protocol. For soybean *pathogenesis-related gene*  
153 *protein 1* (*GmPRI*) expression profiles, soybean leaves were treated with or without  
154 0.1% CNF. At 24 hours after CNF treatment, total RNA was extracted from leaves and  
155 purified using RNAiso Plus (TaKaRa) according to the manufacture's protocol. Two  
156 micrograms of total RNA were treated with gDNA Remover (TOYOBO, Osaka, Japan)  
157 to eliminate genomic DNA, and the DNase-treated RNA was reverse transcribed using  
158 the ReverTra Ace qPCR RT Master Mix (TOYOBO). The cDNA (1:10) was then used  
159 for RT-qPCR using the primers shown in Supplementary Table S1 with  
160 THUNDERBIRD SYBR qPCR Mix (TOYOBO) on a Thermal Cycler Dice Real Time  
161 System (TaKaRa). *P. pachyrhizi* *Elongation factor 1 $\alpha$*  (*PpEF1 $\alpha$* ) and *Ubiquitin 5*  
162 (*PpUBQ5*) were used to normalize *P. pachyrhizi* gene expression. Soybean *Actin 4*  
163 (*GmAct4*) was used as an internal control to normalize soybean *GmPRI* gene  
164 expression.

165

#### 166 **Contact angle measurement on soybean leaves**

167 The surface hydrophobicity on the CNF-treated leaves was investigated based  
168 on contact angle measurement using an automatic contact angle meter DM-31(Kyowa  
169 Interface Science, Niiza, Japan). The contact angle was measured by dropping 2  $\mu$ l of  
170 water from a syringe attached to the DM-31 automatic contact angle meter. The contact

171 angle was measured on the adaxial and abaxial leaf surfaces with or without 0.1% CNF  
172 treatments. The contact angle was analyzed using the multi-functional integrated  
173 analysis software FAMAS (Kyowa Interface Science).

174

## 175 **Results**

### 176 **Covering soybean leaves with CNF confers resistance against *P. pachyrhizi***

177 To investigate the potential application of CNF in agriculture, especially disease  
178 resistance against pathogens, we first treated soybean leaves with two CNF types  
179 derived from bamboo (BC) and needle-leaved tree (NC). At 4 hours after spraying with  
180 0.1% CNF, we challenged soybean leaves with *P. pachyrhizi* and observed lesion  
181 formation including uredinia at 10 days after inoculation. Both CNF-treated leaves  
182 showed reduced lesion area compared to control leaves (Fig. 1A). Both CNF-treated  
183 leaves showed significantly reduced lesion number compared to control leaves (Fig. 1B).  
184 These results indicate that covering soybean leaves with CNF confers resistance against  
185 *P. pachyrhizi*.

186 Nanofibers such as chitin nanofibers induce plant immune responses by  
187 activating defense-related gene expression (23). Therefore, one could argue that the  
188 CNF-induced resistance phenotype in soybean plants may result from defense response  
189 activation rather than from the direct effects of CNF treatments against *P. pachyrhizi*. To  
190 rule out this possibility, we investigated the expression profiles of the defense marker  
191 gene *GmPRI* after CNF treatments. *GmPRI* expression in CNF-treated leaves showed  
192 no significant induction compared to control leaves (Fig. S1). These results confirmed  
193 that the CNF-induced resistance phenotype against *P. pachyrhizi* is a direct effect of  
194 CNF treatment.

195



196 **Covering soybean leaves with CNF suppresses formation of *P. pachyrhizi***  
197 **pre-infection structures**

198         Since both CNF-treatments suppressed the lesion number, we next investigated  
199 the formation of pre-infection structures including germ-tubes and appressoria on  
200 CNF-treated leaves. In control leaves, around 60% of urediniospores germinated, and  
201 ~15% and ~30% formed appressoria on adaxial and abaxial leaves, respectively (Fig.  
202 2A and Fig. 2B). In CNF-treated leaves, around 60% of urediniospores germinated, and  
203 interestingly less than 5% of them formed appressoria on both adaxial and abaxial  
204 leaves (Fig. 2A and Fig. 2B). These results suggest that covering soybean leaves with  
205 CNF suppresses formation of pre-infection structures including germ-tubes and  
206 appressoria.

207

208 **Covering soybean leaves with CNF changes gene expression profiles related to**  
209 **formation of pre-infection structures**

210         Ishiga et al. (17) reported that gene expression related to formation of  
211 pre-infection structures was induced on the hydrophobic surface based on *P. pachyrhizi*  
212 transcriptome analysis. Since CNF-treatments suppressed formation of pre-infection  
213 structures including germ-tubes and appressoria, we next investigated gene expression  
214 profiles related to formation of pre-infection structures. The expression of *chitin*  
215 *synthase 5-1 (CHS5-1)* and *TKL family protein kinase* was suppressed in CNF-treated  
216 leaves at 48 hours after inoculation with *P. pachyrhizi* (Fig. 3A and Fig. 3B).  
217 Furthermore, the expression of *metacaspase* and *NADH dehydrogenase* was suppressed  
218 in CNF-treated leaves at 24 and 48 hours after inoculation with *P. pachyrhizi* (Fig. 3C  
219 and Fig. 3D). These results suggest that covering soybean leaves with CNF changes  
220 gene expression profiles related to formation of pre-infection structures.

221 Chitin synthases (CHSs) are key enzymes in the biosynthesis of the fungal cell  
222 wall structural component, chitin. Since *CHS5-1* expression was suppressed in  
223 CNF-treated leaves, we next tested the expression profiles of other *P. pachyrhizi* *CHS*  
224 genes in CNF-treated leaves. Except *CHS2-1*, all *CHS* genes transcripts were not  
225 significantly suppressed in CNF-treated leaves (Fig. S2B, Fig. S2C, Fig. S2D, Fig. S2E,  
226 Fig. 2F, Fig. 2H and Fig. S2H). In addition to *CHS5-1*, *CHS2-1* expression was  
227 suppressed in CNF-treated leaves (Fig. S2A). Together, these results suggest that  
228 CNF-treatments suppress the expression of *CHS5-1* and *CHS2-1*, resulting in reduced  
229 chitin biosynthesis activity in the *P. pachyrhizi* cell wall.

230

### 231 **CNF converts leaf surface properties from hydrophobic to hydrophilic**

232 CNF has amphipathic properties, and thus can convert material surface  
233 properties from hydrophobic to hydrophilic, and *vice versa* (21). To confirm whether  
234 CNF-treatments can convert soybean leaf surface properties from hydrophobic to  
235 hydrophilic, we decided to quantify the differences in surface hydrophobicity by  
236 measuring the contact angle at the interface of a liquid (water) drop with the leaf surface.  
237 A greater contact angle ( $>90^\circ$ ) is indicative of poor wetting or hydrophobicity.  
238 Interestingly, significant differences in the contact angle were observed between control  
239 and CNF-treated adaxial leaf surfaces (Fig. S3A). The adaxial leaf surface of control  
240 leaves exhibited an average contact angle of  $128^\circ$ , whereas CNF-treated leaves showed  
241 a dramatic decrease in the contact angle (around  $90^\circ$ ), which is indicative of a  
242 hydrophilic surface (Fig. 4A). Similarly, significant differences in the contact angle  
243 were observed between control and CNF-treated abaxial leaf surfaces (Fig. S3B). The  
244 abaxial leaf surface of control leaves exhibited an average contact angle of  $127^\circ$ ,  
245 whereas CNF-treated leaves showed a dramatic decrease in contact angle (around  $70^\circ$ ;

246 Fig. 4B). These results clearly indicate that CNF-treatments can convert leaf surface  
247 properties from hydrophobic to hydrophilic.

248

## 249 **Discussion**

250 We investigated the potential application of CNF in agriculture, especially disease  
251 protection in soybean plants against the rust pathogen, *P. pachyrhizi*, and found that  
252 CNF-treated soybean leaves conferred resistance against *P. pachyrhizi* (Fig. 1A and Fig.  
253 1B). CNF-treatments can convert the soybean leaf surface properties from hydrophobic  
254 to hydrophilic (Fig. 4A and Fig. 4B), resulting in suppression of *P. pachyrhizi* genes  
255 involved in the formation of pre-infection structures, including germ-tubes and  
256 appressoria (Fig. 3) associated with reduced appressoria formation (Fig. 2). These  
257 results provide new insights into CNF application on *P. pachyrhizi* disease management  
258 strategies.

259 We demonstrated that CNF-treatments conferred soybean resistance against *P.*  
260 *pachyrhizi* associated with reduced lesion formation (Fig. 1A and Fig. 1B). The  
261 application of chitin nanofibers for plant protection against pathogens has been  
262 investigated. Egusa et al. (23) reported that chitin nanofibers effectively reduced fungal  
263 and bacterial pathogen infections in *Arabidopsis thaliana* by activating plant defense  
264 responses, including reactive oxygen species (ROS) production and defense-related  
265 gene expression. Furthermore, chitin nanofiber treatment can reduce the occurrence of  
266 Fusarium wilt disease in tomato plants (24). These results suggest that chitin nanofibers  
267 activate plant immunity, resulting in reduced pathogen infection. However, we showed  
268 no elicitor activity of CNF based on the *GmPRI* defense maker gene expression profiles  
269 (Fig. S1). Although there is no similarity to the mechanism by which nanofibers,  
270 including cellulose and chitin, function to protect plants against pathogens, both

271 nanofibers will be able to provide eco-friendly disease control strategies in sustainable  
272 agriculture.

273       Formation of pre-infection structures including germ-tubes and appressoria was  
274 significantly suppressed in CNF-treated leaves compared to control leaves (Fig. 2).  
275 Consistent with our results, Uppalapati et al. (16) reported the reduced formation of  
276 pre-infection structures on a *M. truncatula irg1* mutant, in which the epicuticular waxes  
277 were completely defective and the surface property was changed to hydrophilic. These  
278 results indicate that properties such as hydrophobicity are important to form *P.*  
279 *pachyrhizi* pre-infection structures during early infection stages. The importance of  
280 hydrophobicity and/or epicuticular waxes on the formation of germ-tubes and  
281 appressoria has also been reported for other fungal pathogens (25–27). Further  
282 characterization of the mechanisms by which fungal pathogens recognize plant surface  
283 properties and initiate infection behavior will be needed to develop effective and  
284 sustainable disease control methods.

285       CNF-treatments suppressed gene expression related to chitin formation, including  
286 *CHS2* and *CHS5*, which are associated with reduced formation of pre-infection  
287 structures (Fig. S2, Fig. 2 and Fig. 3). *CHS5* is important in cell wall formation in most  
288 filamentous fungi (28, 29). Treitschke et al. (30) reported that an *Ustilago maydis CHS5*  
289 mutant  $\Delta msc1$  showed reduced virulence associated with abnormal hyphal morphology.  
290 Madrid et al. (31) also demonstrated that *CHS5* in *Fusarium oxysporum*, a causal agent  
291 of tomato vascular wilt, has a crucial role in virulence and mediates the tomato  
292 protective response. A *F. oxysporum CHS5* mutant could not infect tomato, exhibiting  
293 abnormal morphologies such as hyphal swelling, due to changes in the cell wall  
294 properties (31). These results suggest that *CHS5* gene deficiency or mutation causes  
295 morphological abnormalities in fungal cell wall formation, leading to virulence

296 suppression. Together, it is tempting to speculate that suppression of *P. pachyrhizi* *CHS5*  
297 in CNF-treated leaves may result in changes in cell wall properties of *P. pachyrhizi*  
298 pre-infection structures. Further characterization of *CHS5* based on dsRNA-mediated  
299 silencing such as spray-induced gene silencing (SIGS) and host-induced gene silencing  
300 (HIGS), in conjunction with analysis of *P. pachyrhizi* cell wall properties on  
301 CNF-treated leaves, will be necessary to understand *CHS5* molecular function during  
302 formation of pre-infection structures.

303 We demonstrated that CNF-treatments suppressed ASR, one of the most  
304 important soybean diseases (Fig. 1A and Fig. 1B) associated with reduced formation of  
305 pre-infection structures (Fig. 2A and Fig. 2B). Because numerous rust and filamentous  
306 fungal pathogens form pre-infection structures during early infection stages, these  
307 results imply that CNF might be an additional disease management tool to prevent crop  
308 diseases against these pathogens. However, we tested the ability of CNF to protect  
309 plants against an obligate biotrophic pathogen, but not other pathogen types, including  
310 hemibiotrophs and necrotrophs. Therefore, further characterization of CNF effects on  
311 disease suppression not only against fungal pathogens, but also against bacterial  
312 pathogens will be needed.

313 In summary, CNF-treatments confer resistance against *P. pachyrhizi*, a causal  
314 agent of ASR. Moreover, CNF-treatments can change leaf surface hydrophobicity,  
315 resulting in gene suppression related to chitin synthase, which is associated with  
316 reduced formation of pre-infection structures including *P. pachyrhizi* germ-tubes and  
317 appressoria (Fig. 5). Since CNF is an abundant and renewable biomass in nature, CNF  
318 application for plant protection will provide a new avenue into eco-friendly and  
319 sustainable disease management.

320

321 **Figure legends**

322 **Figure 1. *P. pachyrhizi* lesion formation on CNF-treated soybean leaves**

323 (A) Lesions resulting from *P. pachyrhizi* infection on the abaxial leaf surface of control,  
324 leaves covered with 0.1% cellulose nanofiber derived from bamboo (BC) and  
325 needle-leaved tree (NC). Soybean plants were spray-inoculated with *P. pachyrhizi* ( $1 \times$   
326  $10^5$  spores/ml), and photographs were taken at 10 days after inoculation. Bars indicate  
327 0.2 cm. (B) Lesion numbers resulting from *P. pachyrhizi* infection on the abaxial leaf  
328 surface of control, leaves covered with 0.1% cellulose nanofiber derived from bamboo  
329 (BC) and needle-leaved tree (NC). Soybean plants were spray-inoculated with *P.*  
330 *pachyrhizi* ( $1 \times 10^5$  spores/ml) and lesion numbers were counted to calculate lesion  
331 number per  $\text{cm}^2$ . Vertical bars indicate the standard error of the means ( $n = 54$ ).  
332 Asterisks indicate a significant difference between control and CNF-treatments in a *t*  
333 test (\*\*  $p < 0.01$ ).

334

335 **Figure 2. Suppression of *P. pachyrhizi* pre-infection structures on CNF-treated**  
336 **soybean leaves**

337 *P. pachyrhizi* pre-infection structure formation on the adaxial (A) and abaxial (B)  
338 surfaces of control, leaves covered with 0.1% cellulose nanofiber derived from bamboo  
339 (BC) and needle-leaved tree (NC). Soybean plants were spray-inoculated with *P.*  
340 *pachyrhizi* ( $2 \times 10^5$  spores/ml). Photographs were taken at 3 days after inoculation and  
341 the percentage of germinated (Ge) urediniospores and differentiated germ-tubes with  
342 appressoria (Ap) were evaluated as described in the Methods. Vertical bars indicate the  
343 standard error of the means ( $n = 9$ ). Asterisks indicate a significant difference between  
344 control and CNF-treatments in a *t* test (\*  $p < 0.05$ , \*\*  $p < 0.01$ ).

345

346 **Figure 3. Gene expression profiles related to formation of *P. pachyrhizi***  
347 **pre-infection structures on CNF-treated soybean leaves**

348 Gene expression profiles related to *P. pachyrhizi* pre-infection structures including  
349 *CHS5-1* (A), *TKL family protein kinase* (B), *metacaspase* (C), and *NADH*  
350 *dehydrogenase* (D) during *P. pachyrhizi* early infection steps in control leaves, leaves  
351 covered with 0.1% cellulose nanofiber derived from bamboo (BC) and needle-leaved  
352 tree (NC). Soybean plants were drop-inoculated with *P. pachyrhizi* (10  $\mu$ l of  $2 \times 10^5$   
353 spores/ml). Total RNAs including soybean plants and *P. pachyrhizi* were purified at 24  
354 and 48 hours after inoculation, and expression profiles were evaluated using RT-qPCR.  
355 *P. pachyrhizi* *Elongation factor* and *Ubiquitin 5* were used to normalize the samples.  
356 Vertical bars indicate the standard error of the means ( $n = 4$ ). Asterisks indicate a  
357 significant difference between control and CNF-treatments in a *t* test (\*  $p < 0.05$ , \*\*  $p <$   
358 0.01).

359

360 **Figure 4. Reduction of contact angle and hydrophobicity on CNF-treated soybean**  
361 **leaves**

362 Contact angles of water droplets on the adaxial (A) and abaxial (B) leaf surface of  
363 control, leaves covered with 0.1% cellulose nanofiber derived from bamboo (BC) and  
364 needle-leaved tree (NC). Contact angles were evaluated as described in the Methods.  
365 Vertical bars indicate the standard error of the means ( $n = 60$ ). Asterisks indicate a  
366 significant difference between control and CNF-treatments in a *t* test (\*  $p < 0.05$ , \*\*  $p <$   
367 0.01).

368

369 **Figure 5. Proposed mechanism model by which CNF-treatments confer resistance**  
370 **against *P. pachyrhizi***

371 CNF-treatments convert leaf surface properties from hydrophobic to hydrophilic. The  
372 formation of pre-infection structures, and the associated gene expressions related to  
373 these formations are suppressed on CNF-treated leaves, resulting in reduced *P.*  
374 *pachyrhizi* infection. Gt, Ap, and Ht show germ-tubes, appressoria, and haustoria,  
375 respectively.

376

377 **Supplementary Figure S1. Expression of soybean defense marker gene *GmPR1* in**  
378 **response to CNF**

379 Soybean plants were treated with 0.1% cellulose nanofiber derived from bamboo (BC)  
380 and needle-leaved tree (NC). Total RNA was purified at 24 hours after treatment and  
381 expression profiles were evaluated using RT-qPCR. Soybean *Actin4* (*GmAct4*) was used  
382 as an internal control to normalize gene expression. NS indicates not significant  
383 between control and CNF-treatments in a *t* test.

384

385 **Supplementary Figure S2. Expression profiles of chitin synthases (*CHSs*), including**  
386 ***CHS2-1* (A), *CHS2-2* (B), *CHS2-3* (C), *CHS3-1* (D), *CHS3-2* (E), *CHS3-3* (F), *CHS4***  
387 **(G), and *CHS5-2* (H) during the early *P. pachyrhizi* infection stage on the surface of**  
388 **control, leaves covered with 0.1% cellulose nanofiber derived from bamboo (BC)**  
389 **and needle leaf tree (NC)**

390 Soybean plants were drop-inoculated with *P. pachyrhizi* ( $2 \times 10^5$  spores/ml). Total  
391 RNAs including soybean plants and *P. pachyrhizi* were purified at 24 and 48 hours after  
392 inoculation and expression profiles were evaluated using RT-qPCR. *Elongation factor*  
393 and *Ubiquitin 5* were used to normalize the samples. Vertical bars indicate the standard  
394 error of the means ( $n = 4$ ). Asterisks indicate a significant difference between control  
395 and CNF-treatments in a *t* test (\*  $p < 0.05$ , \*\*  $p < 0.01$ ).



396

397 **Supplementary Figure S3. Reduction of contact angle and hydrophobicity on**  
398 **CNF-treated soybean leaves**

399 Contact angles of water droplets on the adaxial (**A**) and abaxial (**B**) leaf surface of  
400 control, leaves covered with 0.1% cellulose nanofiber derived from bamboo (BC) and  
401 needle-leaved tree (NC). Contact angles were evaluated as described in the Methods.

402

403 **References**

- 404 1. Yorinori, J.T., Paiva, W.M., Frederick, R.D., Costamilan, L.M., Bertagnolli, P.F.,  
405 Hartman, G.E., Godoy, C.V., and Nunes, J. Epidemics of soybean rust (*Phakopsora*  
406 *pachyrhizi*) in Brazil and Paraguay from 2001 to 2003. *Plant Disease*. 2005; 89:  
407 675–677.
- 408 2. Slaminko, T.L., Miles, M.R., Frederick, R.D., Bonde, M.R., and Hartman, G.L.  
409 New legume hosts of *Phakopsora pachyrhizi* based on greenhouse evaluations.  
410 *Plant Disease*. 2008; 92: 767–771.
- 411 3. Bolton, M.D., Kolmer, J.A., and Garvin, D.F. Wheat leaf rust caused by *Puccinia*  
412 *tritricina*. *Molecular Plant Pathology*. 2008; 9: 563–575.
- 413 4. Goellner, K., Loehrer, M., Langenbach, C., Conrath, U., Koch, E., and Schaffrath,  
414 U. *Phakopsora pachyrhizi*, the causal agent of Asian soybean rust. *Molecular Plant*  
415 *Pathology*. 2010; 11: 169–177.
- 416 5. Maltby, L., Brock, T.C., and Van den Brink, P.J. Fungicide risk assessment for  
417 aquatic ecosystems: importance of interspecific variation, toxic mode of action, and  
418 exposure regime. *Environmental Science and Technology*. 2009; 43: 7556–7563.
- 419 6. Godoy, C.V., Bueno, A.d.F., and Gazziero, D.L.P. Brazilian soybean pest  
420 management and threats to its sustainability. *Outlooks on Pest management*. 2015;

- 421 7. Langenbach, C., Campe, R., Beyer, S.F., Mueller, A.N., and Conrath, U. Fighting  
422 Asian soybean rust. *Frontiers in Plant Science*. 2016; 7: 797.
- 423 8. Klosowski, A.C., Castellar, C., Stammler, G., and May De Mio, L.L. Fungicide  
424 sensitivity and monocyclic parameters related to the *Phakopsora*  
425 *pachyrhizi*–soybean pathosystem from organic and conventional soybean  
426 production systems. *Plant Pathology*. 2018; 67: 1697–1705.
- 427 9. Bromfield, K.R., and Hartwig, E.E. Resistance to soybean rust and mode of  
428 inheritance. *Crop Science*. 1980; 20: 254-255.
- 429 10. McLean, R., and Byth, D. Inheritance of resistance to rust (*Phakopsora pachyrhizi*)  
430 in soybeans. *Australian Journal of Agricultural Research*. 1980; 31: 951–956.
- 431 11. Hartwig, E.E. Identification of a fourth major gene conferring resistance to soybean  
432 rust. *Crop Science*. 1986; 26: 1135–1136.
- 433 12. Garcia, A., Calvo, E.S., de Souza Kiihl, R.A., Harada, A., Hiromoto, D.M., and  
434 Vieira, L.G. Molecular mapping of soybean rust (*Phakopsora pachyrhizi*) resistance  
435 genes: discovery of a novel locus and alleles. *Theor Appl Genet*. 2008; 117:  
436 545–553.
- 437 13. Li, S., Smith, J.R., Ray, J.D., and Frederick, R.D. Identification of a new soybean  
438 rust resistance gene in PI 567102B. *Theoretical and Applied Genetics*. 2012; 125:  
439 133–142.
- 440 14. Monteros, M.J., Missaoui, A.M., Phillips, D.V., Walker, D.R., and Boerma, H.R.  
441 Mapping and confirmation of the ‘Hyuuga’ red-brown lesion resistance gene for  
442 Asian soybean rust. *Crop Science*. 2007; 47: 829–834.
- 443 15. Kawashima, C.G., Guimarães, G.A., Nogueira, S.R., MacLean, D., Cook, D.R.,  
444 Steuernagel, B., Baek, J., Bouyioukos, C., Melo, B.o.V., Tristão, G., de Oliveira,  
445 J.C., Rauscher, G., Mittal, S., Panichelli, L., Bacot, K., Johnson, E., Iyer, G., Tabor,

- 446 G., Wulff, B.B., Ward, E., Rairdan, G.J., Broglie, K.E., Wu, G., van Esse, H.P.,  
447 Jones, J.D., and Brommonschenkel, S.H. A pigeonpea gene confers resistance to  
448 Asian soybean rust in soybean. *Nature Biotechnology*. 2016; 34: 661–665.
- 449 16. Uppalapati, S.R., Ishiga, Y., Doraiswamy, V., Bedair, M., Mittal, S., Chen, J.,  
450 Nakashima, J., Tang, Y., Tadege, M., Ratet, P., Chen, R., Schultheiss, H., and  
451 Mysore, K.S. Loss of abaxial leaf epicuticular wax in *Medicago truncatula*  
452 *irg1/palm1* mutants results in reduced spore differentiation of anthracnose and  
453 nonhost rust pathogens. *Plant Cell*. 2012; 24: 353–370.
- 454 17. Ishiga, Y., Uppalapati, S., and Mysore, K.S. Expression analysis reveals a role for  
455 hydrophobic or epicuticular wax signals in pre-penetration structure formation of  
456 *Phakopsora pachyrhizi*. *Plant Signaling and Behavior*. 2013; 8: e26959.
- 457 18. Mondal, S. Preparation, properties and applications of nanocellulosic materials.  
458 *Carbohydrate Polymers*. 2017; 163: 301–316.
- 459 19. Abe, K., Iwamoto, S., and Yano, H. Obtaining cellulose nanofibers with a uniform  
460 width of 15 nm from wood. *Biomacromolecules*. 2007; 8: 3276–3278.
- 461 20. Kondo, T., Kose, R., Naito, H., and Kasai, W. Aqueous counter collision using  
462 paired water jets as a novel means of preparing bio-nanofibers. *Carbohydrate*  
463 *Polymers*. 2014; 112: 284–290.
- 464 21. Kose, R., Kasai, W., and Kondo, T. Switching surface properties of substrates by  
465 coating with a cellulose nanofiber having a high adsorbability. *Journal of Fiber*  
466 *Science and Technology*. 2011; 67: 163–168.
- 467 22. Yamaoka, Y., Yamanaka, N., and Akamatsu, H. Pathogenic races of soybean rust  
468 *Phakopsora pachyrhizi* collected in Tsukuba and vicinity in Ibaraki, Japanese  
469 *Journal of General Plant Pathology*. 2014; 80: 184–188.
- 470 23. Egusa, M., Matsui, H., Urakami, T., Okuda, S., Ifuku, S., Nakagami, H., and

- 471 Kaminaka, H. Chitin nanofiber elucidates the elicitor activity of polymeric chitin in  
472 plants. *Front Plant Sci.* 2015; 6: 1098.
- 473 24. Egusa, M., Parada, R., Aklog, Y.F., Ifuku, S., and Kaminaka, H. Nanofibrillation  
474 enhances the protective effect of crab shells against *Fusarium* wilt disease in tomato.  
475 *Int J Biol Macromol.* 2019; 128: 22–27.
- 476 25. Mendoza-Mendoza, A., Berndt, P., Djamei, A., Weise, C., Linne, U., Marahiel, M.,  
477 Vranes, M., Kämper, J., and Kahmann, R. Physical-chemical plant-derived signals  
478 induce differentiation in *Ustilago maydis*. *Molecular Microbiology*, 2009; 71:  
479 895–911.
- 480 26. Hansjakob, A., Bischof, S., Bringmann, G., Riederer, M., and Hildebrandt, U.  
481 (2010). Very-long-chain aldehydes promote *in vitro* prepenetration processes of  
482 *Blumeria graminis* in a dose- and chain length-dependent manner. *New Phytol*  
483 2010; 188: 1039–1054.
- 484 27. Weidenbach, D., Jansen, M., Franke, R.B., Hensel, G., Weissgerber, W., Ulferts, S.,  
485 Jansen, I., Schreiber, L., Korzun, V., Pontzen, R., Kumlehn, J., Pillen, K., and  
486 Schaffrath, U. Evolutionary conserved function of barley and Arabidopsis  
487 3-KETOACYL-CoA SYNTHASES in providing wax signals for germination of  
488 powdery mildew fungi. *Plant Physiology.* 2014; 166: 1621–1633.
- 489 28. Takeshita, N., Ohta, A., and Horiuchi, H. CsmA, a class V chitin synthase with a  
490 myosin motor-like domain, is localized through direct interaction with the actin  
491 cytoskeleton in *Aspergillus nidulans*. *Molecular Biology of the Cell.* 2005; 16:  
492 1961-1970.
- 493 29. Lenardon, M.D., Munro, C.A., and Gow, N.A. Chitin synthesis and fungal  
494 pathogenesis. *Current Opinion in Microbiology.* 2010; 13: 416–423.
- 495 30. Treitschke, S., Doehlemann, G., Schuster, M., and Steinberg, G. The myosin motor

496 domain of fungal chitin synthase V is dispensable for vesicle motility but required  
497 for virulence of the maize pathogen *Ustilago maydis*. *Plant Cell*. 2010; 22:  
498 2476–2494.

499 31. Madrid, M.P., Di Pietro, A., and Roncero, M.I. Class V chitin synthase determines  
500 pathogenesis in the vascular wilt fungus *Fusarium oxysporum* and mediates  
501 resistance to plant defence compounds. *Molecular Microbiology*. 2003; 47:  
502 257–266.

503 32. Zhao, Y., Chang, X., Qi, D., Dong, L., Wang, G., Fan, S., Jiang, L., Cheng, Q.,  
504 Chen, X., Han, D., Xu, P., and Zhang, S. (2017). A novel soybean ERF transcription  
505 factor, *GmERF113*, increases resistance to *Phytophthora sojae* infection in soybean.  
506 *Frontiers in Plant Science*. 2017; 8: 299.

507

508

**A**

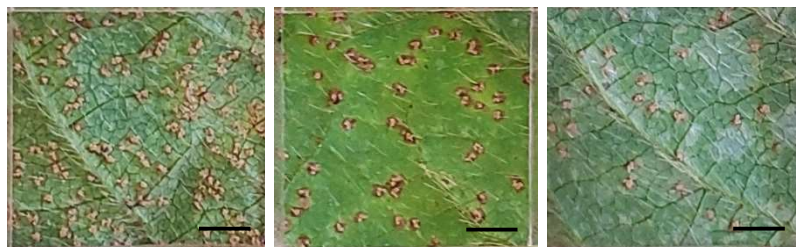

Control

BC

NC

**B**

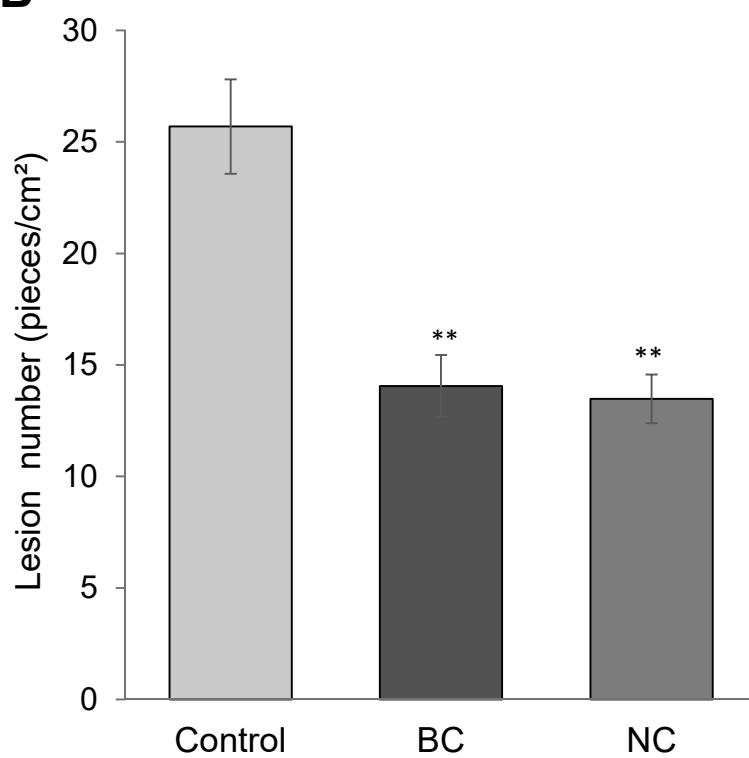

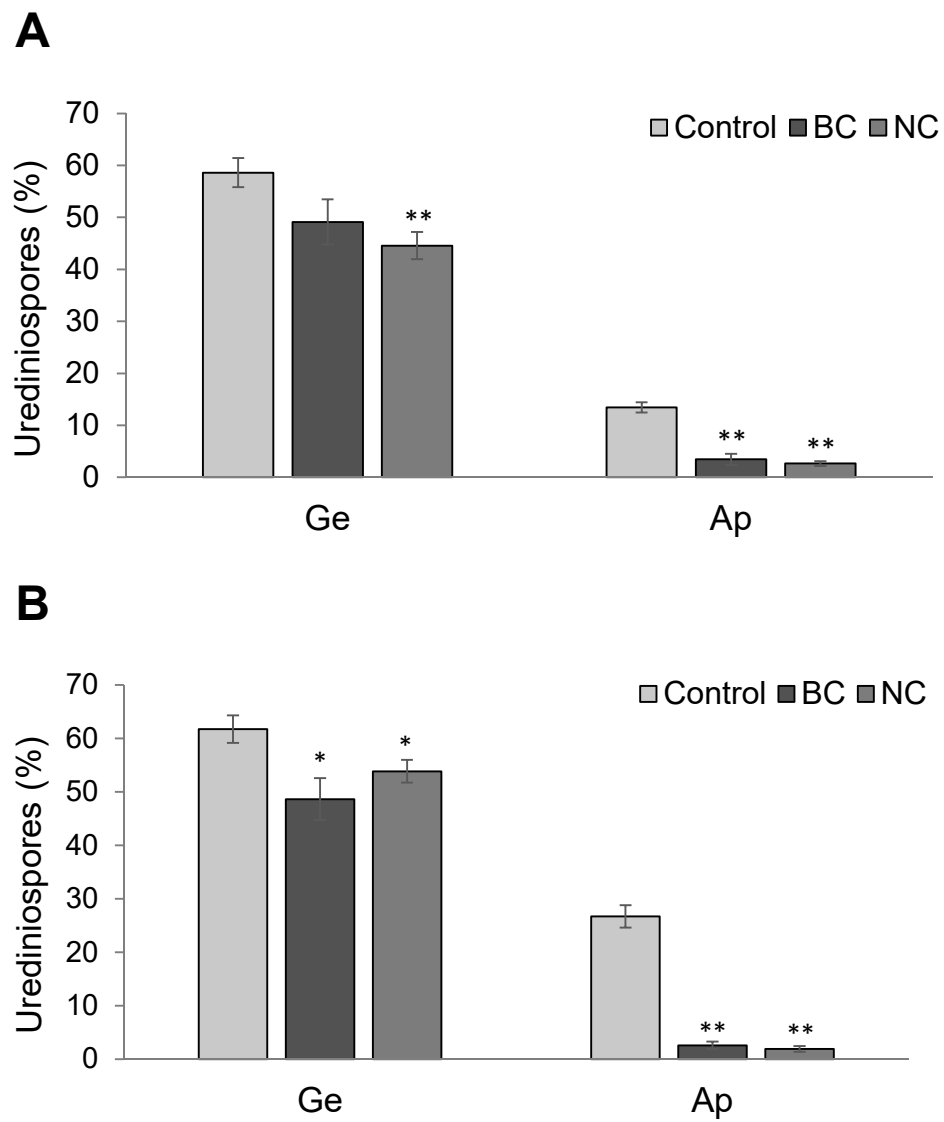

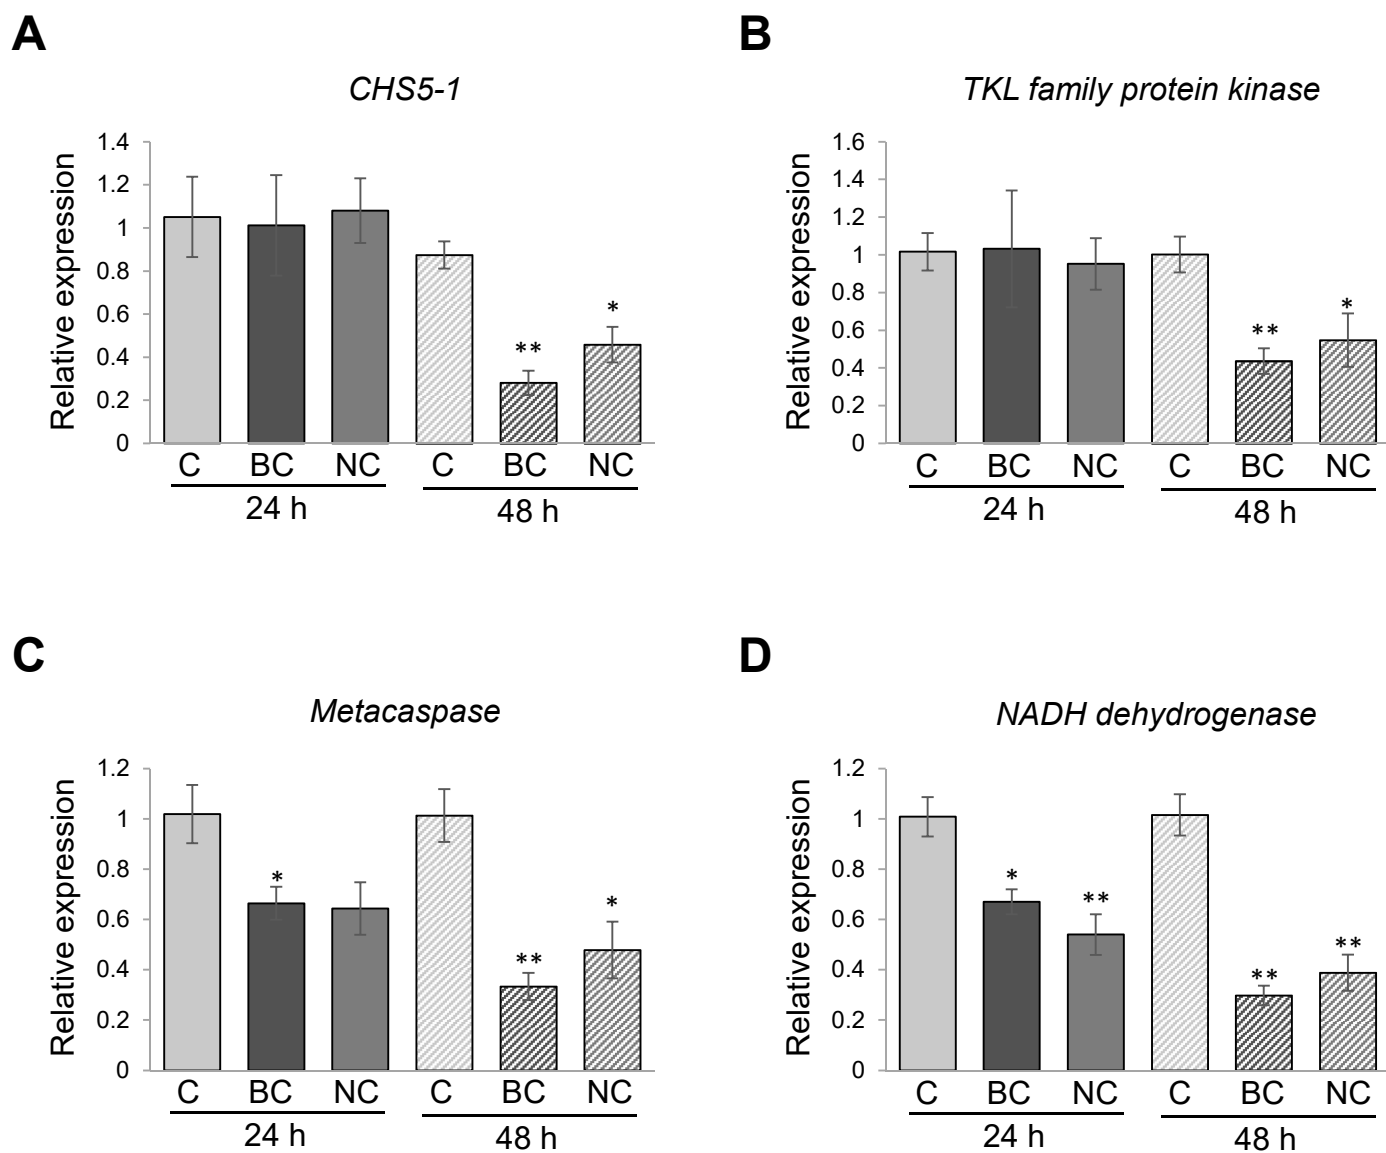



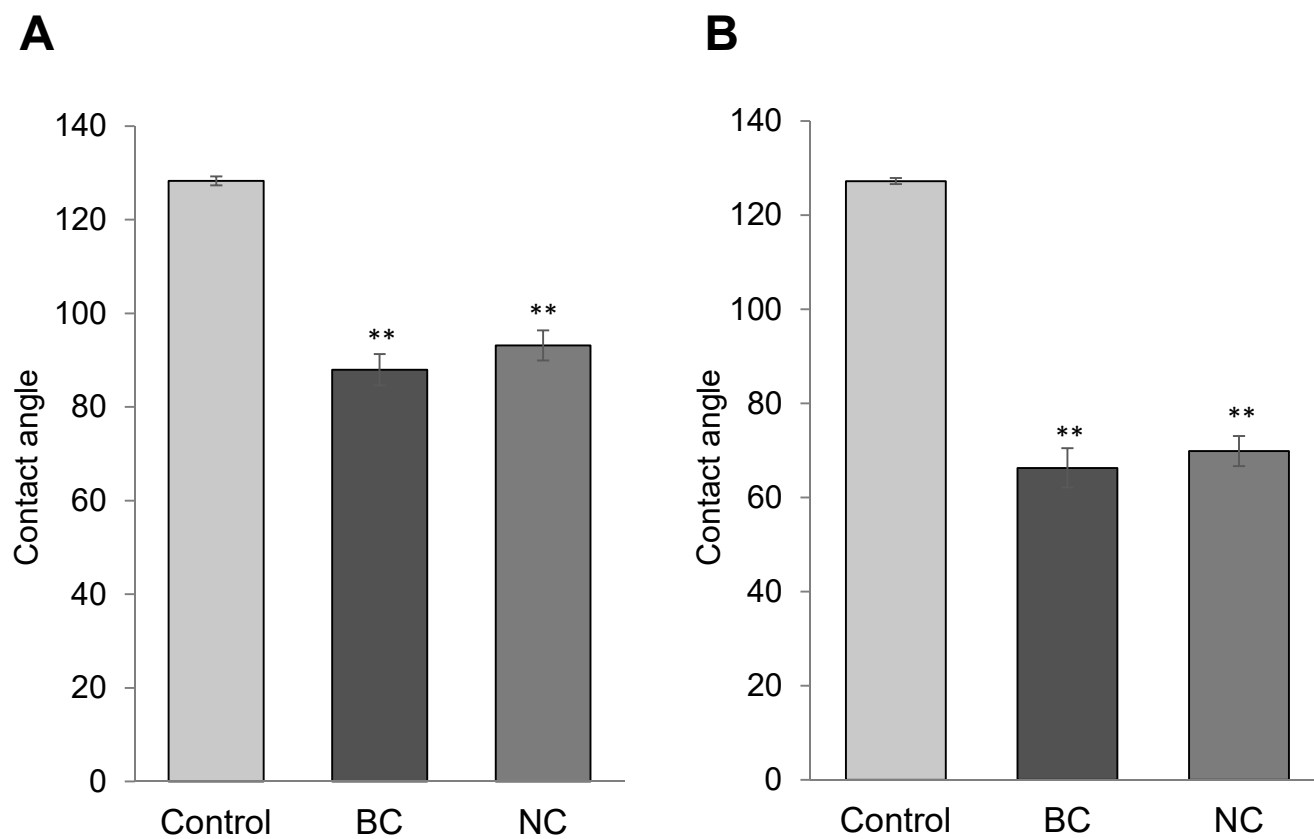

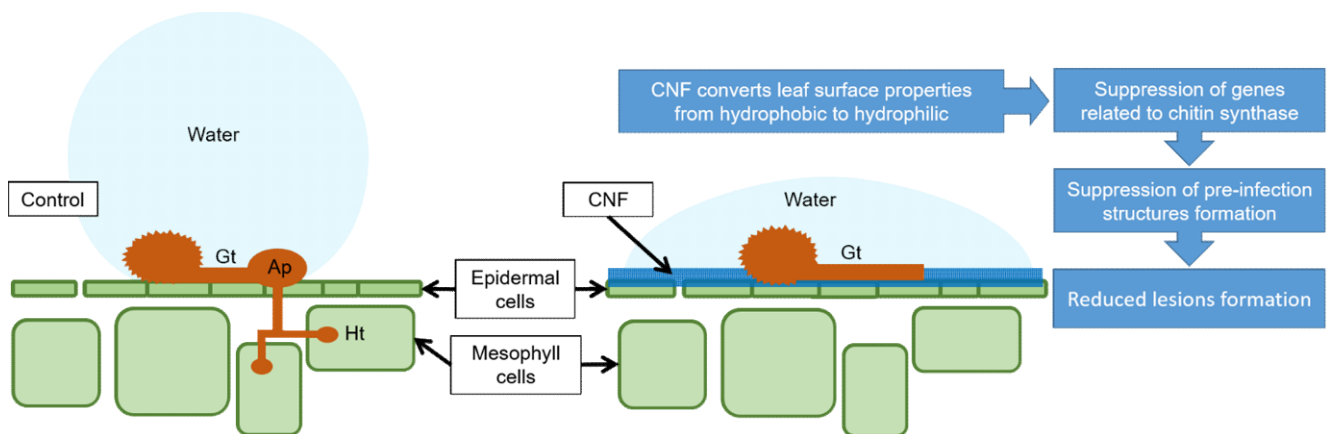

Source: https://www.biorxiv.org/content/10.1101/2020.08.26.267807v1.full.pdf
