# Supplementary material for: Covering soybean leaves with cellulose nanofiber changes leaf surface hydrophobicity and confers resistance against Phakopsora pachyrhizi
Source: bioRxiv or medRxiv preprint supplement (doi:10.1101/2020.08.26.267807), 2021-06-13
Supplement: Supplementary file [file media-2.pdf]

**Supplementary Table S1** Primer sets used in this study

| Gene                            | Primer name | Primer usage                                 | Primer sequence           | Reference  |
|---------------------------------|-------------|----------------------------------------------|---------------------------|------------|
| <i>GmPR1</i>                    | GmPR1-FW    | Expression analysis for soybean              | GGTCAACGAGAAGGCTAACTATAA  | (32)       |
| <i>GmPR1</i>                    | GmPR1-RV    | Expression analysis for soybean              | TCCAAACAACCTGAGTGTAATGC   | (32)       |
| <i>GmAct4</i>                   | GmAct4-FW   | Expression analysis for soybean              | GATCTACCATGTTCCCAAGT      | (32)       |
| <i>GmAct4</i>                   | GmAct4-RV   | Expression analysis for soybean              | AGGCTGTTGACTAGGAAGAAAC    | (32)       |
| <i>PpCHS2-1</i>                 | PpCHS2-1-FW | Expression analysis for <i>P. pachyrhizi</i> | TTCCAAGCTCTGTTGGTATCAG    | This study |
| <i>PpCHS2-1</i>                 | PpCHS2-1-RV | Expression analysis for <i>P. pachyrhizi</i> | CATATCTCATCACTCCCATGGAC   | This study |
| <i>PpCHS2-2</i>                 | PpCHS2-2-FW | Expression analysis for <i>P. pachyrhizi</i> | CCCTGATGTCAGACTCCATAAAC   | This study |
| <i>PpCHS2-2</i>                 | PpCHS2-2-RV | Expression analysis for <i>P. pachyrhizi</i> | GTTGAGGGATCCTACCGTATCT    | This study |
| <i>PpCHS2-3</i>                 | PpCHS2-3-FW | Expression analysis for <i>P. pachyrhizi</i> | CGACCCAAAGAGAGCAAAGA      | This study |
| <i>PpCHS2-3</i>                 | PpCHS2-3-RV | Expression analysis for <i>P. pachyrhizi</i> | CTTGTACCCACCGCTAAAT       | This study |
| <i>PpCHS3-1</i>                 | PpCHS3-1-FW | Expression analysis for <i>P. pachyrhizi</i> | TCACAACACCCACTCCAATC      | This study |
| <i>PpCHS3-1</i>                 | PpCHS3-1-RV | Expression analysis for <i>P. pachyrhizi</i> | CATATCTCATCACTCCCATGGAC   | This study |
| <i>PpCHS3-2</i>                 | PpCHS3-2-FW | Expression analysis for <i>P. pachyrhizi</i> | CTCTTCTGAGTTGCCGTCTTT     | This study |
| <i>PpCHS3-2</i>                 | PpCHS3-2-RV | Expression analysis for <i>P. pachyrhizi</i> | CATATCTCATCACTCCCATGGAC   | This study |
| <i>PpCHS3-3</i>                 | PpCHS3-3-FW | Expression analysis for <i>P. pachyrhizi</i> | TTCCAAGCTCTGTTGGTATCAG    | This study |
| <i>PpCHS3-3</i>                 | PpCHS3-3-RV | Expression analysis for <i>P. pachyrhizi</i> | CATATCTCATCACTCCCATGGAC   | This study |
| <i>PpCHS4</i>                   | PpCHS4-FW   | Expression analysis for <i>P. pachyrhizi</i> | CCCTTTGTCCTCAGGTTGATAG    | This study |
| <i>PpCHS4</i>                   | PpCHS4-RV   | Expression analysis for <i>P. pachyrhizi</i> | TGAAAGCCCAACCAGAGATAC     | This study |
| <i>PpCHS5-1</i>                 | PpCHS5-1-FW | Expression analysis for <i>P. pachyrhizi</i> | TCTAGGATGGCTAGCCCATTTGGT  | (17)       |
| <i>PpCHS5-1</i>                 | PpCHS5-1-RV | Expression analysis for <i>P. pachyrhizi</i> | GTGATTGTGTTCAAATCCGCCCGT  | (17)       |
| <i>PpCHS5-2</i>                 | PpCHS5-2-FW | Expression analysis for <i>P. pachyrhizi</i> | AGTCTTGAAGAGGCGGATAATG    | This study |
| <i>PpCHS5-2</i>                 | PpCHS5-2-RV | Expression analysis for <i>P. pachyrhizi</i> | CATATCTCATCACTCCCATGGAC   | This study |
| <i>PpPK</i>                     | PpPK-FW     | Expression analysis for <i>P. pachyrhizi</i> | AGGAGTGAA TACTTGCACT TGCG | (17)       |
| <i>PpPK</i>                     | PpPK-RV     | Expression analysis for <i>P. pachyrhizi</i> | ATGCTGTGGTTGTAAGACGGGTGA  | (17)       |
| <i>PpMeta</i>                   | PpMeta-FW   | Expression analysis for <i>P. pachyrhizi</i> | CAACAAGGCCGACCAAGTTTCCAA  | (17)       |
| <i>PpMeta</i>                   | PpMeta-RV   | Expression analysis for <i>P. pachyrhizi</i> | TGCTGATATGCTGCTGCGGGTTA   | (17)       |
| <i>PpNADHD</i>                  | PpNADHD-FW  | Expression analysis for <i>P. pachyrhizi</i> | TCCGAGCAGCTATGAAACACTGGT  | (17)       |
| <i>PpNADHD</i>                  | PpNADHD-RV  | Expression analysis for <i>P. pachyrhizi</i> | AAAGCTTGGTGCCTGTAGTCTC    | (17)       |
| <i>PpEF1<math>\alpha</math></i> | PpEF-FW     | Expression analysis for <i>P. pachyrhizi</i> | ATACGCTCCTGTCTTGATTGCCA   | (17)       |
| <i>PpEF1<math>\alpha</math></i> | PpEF-RV     | Expression analysis for <i>P. pachyrhizi</i> | AACAGTTTGCTCATGTCACGCAC   | (17)       |
| <i>PpUBQ5</i>                   | PpUBQ5-FW   | Expression analysis for <i>P. pachyrhizi</i> | AGAGGGAATTCCTCCAGACCAACA  | (17)       |
| <i>PpUBQ5</i>                   | PpUBQ5-RV   | Expression analysis for <i>P. pachyrhizi</i> | ATTGCATTCCACCACGAAGTCGG   | (17)       |
